# Supplementary material
Source: bioRxiv or medRxiv preprint supplement (https://www.biorxiv.org/highwire/filestream/123393/field_highwire_adjunct_files/2/408492-3.pdf)
Supplement: Supplementary file [file 408492-3.pdf]

Supplementary Table 3. Cohorts used as controls in our analysis

| Cohort | Reference                              | Tissue                                    | Sample Size | Used in Fig. 1C |
|--------|----------------------------------------|-------------------------------------------|-------------|-----------------|
| DGN    | Battle et al, Genome Research 2014     | Whole Blood                               | 909         |                 |
| PIVUS  | Lind et al, Arteriosclerosis, Thrombos | Whole Blood                               | 65          |                 |
| GTEX   | The GTEx Consortium, Nature 2017       | Adipose - Subcutaneous                    | 442         | x               |
| GTEX   | The GTEx Consortium, Nature 2017       | Adipose - Visceral (Omentum)              | 355         |                 |
| GTEX   | The GTEx Consortium, Nature 2017       | Adrenal Gland                             | 190         | x               |
| GTEX   | The GTEx Consortium, Nature 2017       | Artery - Aorta                            | 299         | x               |
| GTEX   | The GTEx Consortium, Nature 2017       | Artery - Coronary                         | 173         |                 |
| GTEX   | The GTEx Consortium, Nature 2017       | Artery - Tibial                           | 441         |                 |
| GTEX   | The GTEx Consortium, Nature 2017       | Bladder                                   | 11          | x               |
| GTEX   | The GTEx Consortium, Nature 2017       | Brain - Amygdala                          | 100         |                 |
| GTEX   | The GTEx Consortium, Nature 2017       | Brain - Anterior cingulate cortex (BA24)  | 121         |                 |
| GTEX   | The GTEx Consortium, Nature 2017       | Brain - Caudate (basal ganglia)           | 160         |                 |
| GTEX   | The GTEx Consortium, Nature 2017       | Brain - Cerebellar Hemisphere             | 136         |                 |
| GTEX   | The GTEx Consortium, Nature 2017       | Brain - Cerebellum                        | 173         |                 |
| GTEX   | The GTEx Consortium, Nature 2017       | Brain - Cortex                            | 158         | x               |
| GTEX   | The GTEx Consortium, Nature 2017       | Brain - Frontal Cortex (BA9)              | 129         |                 |
| GTEX   | The GTEx Consortium, Nature 2017       | Brain - Hippocampus                       | 123         |                 |
| GTEX   | The GTEx Consortium, Nature 2017       | Brain - Hypothalamus                      | 121         |                 |
| GTEX   | The GTEx Consortium, Nature 2017       | Brain - Nucleus accumbens (basal ganglia) | 147         |                 |
| GTEX   | The GTEx Consortium, Nature 2017       | Brain - Putamen (basal ganglia)           | 124         |                 |
| GTEX   | The GTEx Consortium, Nature 2017       | Brain - Spinal cord (cervical c-1)        | 91          |                 |
| GTEX   | The GTEx Consortium, Nature 2017       | Brain - Substantia nigra                  | 88          |                 |
| GTEX   | The GTEx Consortium, Nature 2017       | Breast - Mammary Tissue                   | 290         | x               |
| GTEX   | The GTEx Consortium, Nature 2017       | Cells - EBV-transformed lymphocytes       | 130         |                 |
| GTEX   | The GTEx Consortium, Nature 2017       | Cells - Transformed fibroblasts           | 343         |                 |
| GTEX   | The GTEx Consortium, Nature 2017       | Cervix - Ectocervix                       | 6           | x               |
| GTEX   | The GTEx Consortium, Nature 2017       | Cervix - Endocervix                       | 5           |                 |
| GTEX   | The GTEx Consortium, Nature 2017       | Colon - Sigmoid                           | 233         | x               |
| GTEX   | The GTEx Consortium, Nature 2017       | Colon - Transverse                        | 274         |                 |
| GTEX   | The GTEx Consortium, Nature 2017       | Esophagus - Gastroesophageal Junction     | 244         |                 |
| GTEX   | The GTEx Consortium, Nature 2017       | Esophagus - Mucosa                        | 407         | x               |
| GTEX   | The GTEx Consortium, Nature 2017       | Esophagus - Muscularis                    | 370         |                 |
| GTEX   | The GTEx Consortium, Nature 2017       | Fallopian Tube                            | 7           | x               |
| GTEX   | The GTEx Consortium, Nature 2017       | Heart - Atrial Appendage                  | 297         |                 |
| GTEX   | The GTEx Consortium, Nature 2017       | Heart - Left Ventricle                    | 303         | x               |
| GTEX   | The GTEx Consortium, Nature 2017       | Kidney - Cortex                           | 45          | x               |
| GTEX   | The GTEx Consortium, Nature 2017       | Liver                                     | 175         | x               |
| GTEX   | The GTEx Consortium, Nature 2017       | Lung                                      | 427         | x               |
| GTEX   | The GTEx Consortium, Nature 2017       | Minor Salivary Gland                      | 97          |                 |
| GTEX   | The GTEx Consortium, Nature 2017       | Muscle - Skeletal                         | 564         | x               |
| GTEX   | The GTEx Consortium, Nature 2017       | Nerve - Tibial                            | 414         | x               |
| GTEX   | The GTEx Consortium, Nature 2017       | Ovary                                     | 133         |                 |
| GTEX   | The GTEx Consortium, Nature 2017       | Pancreas                                  | 248         | x               |
| GTEX   | The GTEx Consortium, Nature 2017       | Pituitary                                 | 183         | x               |
| GTEX   | The GTEx Consortium, Nature 2017       | Prostate                                  | 152         | x               |
| GTEX   | The GTEx Consortium, Nature 2017       | Skin - Not Sun Exposed (Suprapubic)       | 387         |                 |
| GTEX   | The GTEx Consortium, Nature 2017       | Skin - Sun Exposed (Lower leg)            | 473         |                 |
| GTEX   | The GTEx Consortium, Nature 2017       | Small Intestine - Terminal Ileum          | 137         |                 |
| GTEX   | The GTEx Consortium, Nature 2017       | Spleen                                    | 162         | x               |
| GTEX   | The GTEx Consortium, Nature 2017       | Stomach                                   | 262         | x               |
| GTEX   | The GTEx Consortium, Nature 2017       | Testis                                    | 259         |                 |
| GTEX   | The GTEx Consortium, Nature 2017       | Thyroid                                   | 446         |                 |
| GTEX   | The GTEx Consortium, Nature 2017       | Uterus                                    | 111         |                 |
| GTEX   | The GTEx Consortium, Nature 2017       | Vagina                                    | 115         |                 |
| GTEX   | The GTEx Consortium, Nature 2017       | Whole Blood                               | 407         | x               |
